# Supplementary material for: Application of Large-Scale Parentage Analysis for Investigating Natal Dispersal in Highly Vagile Vertebrates: A Case Study of American Black Bears (Ursus americanus)
Source: PLoS One. 2014 Mar 12;9(3):e91168. doi: 10.1371/journal.pone.0091168 (PMC3951290; doi:10.1371/journal.pone.0091168)
Supplement: File S2 — Full list of linear mixed effects models of black bear dispersal probability and dispersal distance. (XLSX) [file pone.0091168.s002.xlsx]

## Sheet: Sheet1
Supplementary File S2. Results of all linear mixed effects models for black bears in Michigan's Northern Lower Penninsula. Model parameters are sex of offspring (offsex), age of offspring (offage), habitat type at the natal site (momhab) and settlement site (offhab), harvest at the natal site (momharv) and settlement site (offharv), habitat suitability rank at the natal site (momhs) and settlemen…
Response = Dispersal probability
Data = all
Model	AIC	ΔAIC	wi
offsex + offage + offharv	361.56	0	0.224109
offsex + offage + offharv + offhs	361.89	0.33	0.190021
offsex + offage + offharv + momhs	362.8	1.24	0.120558
offsex + offage + offharv + momhs + offhs	363.25	1.69	0.0962676
offsex + offage + momharv + offharv	363.53	1.97	0.0836911
offsex + offage + momharv + offharv + momage_corr	363.82	2.26	0.0723946
offsex + offage + momharv + offharv + offhs	363.88	2.32	0.0702551
offsex + offage + momharv + offharv + momhs	364.79	3.23	0.0445732
offsex + offage + momharv + offharv + momhs + offhs	365.24	3.68	0.0355924
offsex + offharv + offhs	367.88	6.32	0.00950799
offsex+offharv	368.25	6.69	0.00790213
offsex + offage + offharv + offhab	368.99	7.43	0.00545827
offsex + offage + momharv + offharv + offhab	370.97	9.41	0.00202817
offsex + offage + momharv + offharv + momhab	371.39	9.83	0.001644
offsex + offharv + offhab	375.05	13.49	0.00026372
offsex + offage + momharv + offharv + momhab + offhab	378.73	17.17	4.18833e-05
offsex + offage + offharv + momharv + momhab + offhab	378.73	17.17	4.18833e-05
offsex + offage + momharv + offharv + momhab + offhab + momage_corr	378.9	17.34	3.84703e-05
offsex + offage + momharv	383.61	22.05	3.65059e-06
offsex * offage + momharv	383.82	22.26	3.28671e-06
offsex + offage + momharv + momage_corr	384.01	22.45	2.98885e-06
offsex + offage + momhs + momharv	385.1	23.54	1.73306e-06
offsex + offage + momage_corr	385.29	23.73	1.576e-06
offsex * offage + momage_corr	385.73	24.17	1.26477e-06
offsex + offage + momhs + momage_corr	386.74	25.18	7.63294e-07
offsex + offage + momhs	386.94	25.38	6.90657e-07
offsex + offage + offhs	387.01	25.45	6.66902e-07
offsex * offage + momhs	387.14	25.58	6.24932e-07
offsex * offage + offhs	387.49	25.93	5.24604e-07
offsex + offage + momhs + offhs + momage_corr	388.33	26.77	3.44689e-07
offsex + offage + momhs + offhs	388.57	27.01	3.05712e-07
offsex + momharv	389.63	28.07	1.79943e-07
offsex + momharv + momage_corr	389.7	28.14	1.73754e-07
offsex+momage_corr	390.69	29.13	1.05916e-07
offsex	391.1	29.54	8.62839e-08
offsex + momhs + momharv	391.27	29.71	7.92528e-08
offsex + offage + momhab + momharv	391.3	29.74	7.80729e-08
offsex + momhs + momage_corr	392.3	30.74	4.73536e-08
offsex+offhs	392.45	30.89	4.3932e-08
offsex + momhs	392.79	31.23	3.70639e-08
offsex * offage + momhab	392.82	31.26	3.65121e-08
offsex + offage + momhab	392.84	31.28	3.61488e-08
offsex + offage + offhab	392.9	31.34	3.50804e-08
offsex * offage + offhab	393.54	31.98	2.54736e-08
offsex + momhab + momharv	398.25	36.69	2.41728e-09
offsex+offhab	398.54	36.98	2.091e-09
offsex+momhab	399.51	37.95	1.28742e-09
offsex + offage + momhab + offhab	400.22	38.66	9.02707e-10
offage+offharv	438.13	76.57	5.29048e-18
offharv	439.05	77.49	3.33979e-18
offage + momharv	457.09	95.53	4.04002e-22
momharv	457.67	96.11	3.023e-22
offage+momage_corr	458.79	97.23	1.72676e-22
momage_corr	459.03	97.47	1.5315e-22
offage	459.47	97.91	1.22906e-22
null	459.81	98.25	1.03691e-22
offage+offhs	460.95	99.39	5.86401e-23
offage + momhs	461.17	99.61	5.25318e-23
offhs	461.2	99.64	5.17497e-23
momhs	461.56	100	4.3225e-23
offage+momhab	467	105.44	2.84744e-24
momhab	467.85	106.29	1.86157e-24
offage+offhab	468.39	106.83	1.42108e-24
offhab	468.78	107.22	1.16932e-24
Response = Dispersal distance
Data = dispersers only
Model	AIC	ΔAIC	wi
offsex * offage + offhab + momhab + offharv + momharv	1251.71	0	0.463414
offsex * offage + offhab + momhab + offharv	1253.35	1.636	0.204511
offsex + offage + offhab + momhab + offharv + momharv	1254.03	2.315	0.145637
offsex * offage + offhab + momhab + momharv	1255.65	3.944	0.0644971
offsex + offage + offhab + momhab + offharv	1255.67	3.962	0.0639192
offsex * offage + offhab + momhab	1257.42	5.715	0.0266056
offsex + offage + offhab + momhab + momharv	1258	6.286	0.0199978
offsex + offage + offhab + momhab	1259.78	8.073	0.0081835
offsex + offhab + momhab	1261.64	9.929	0.00323529
offage + offhab + momhab	1286.34	34.631	1.3994e-08
offsex + offhab	1286.82	35.105	1.10412e-08
offsex+momhab	1288.01	36.303	6.06558e-09
offhab + momhab	1288.47	36.763	4.81931e-09
offsex + offage + offhs + momhs + offharv + momharv	1297.98	46.267	4.16119e-11
offsex + offage + offharv + momharv	1303.49	51.78	2.64292e-12
offsex + offage + offhs + momhs	1304.66	52.95	1.47239e-12
offsex + offharv + momharv	1305.78	54.072	8.40201e-13
offhab + offharv	1307.23	55.523	4.06727e-13
offsex + offharv	1307.36	55.646	3.82466e-13
offsex + offhs + momhs	1307.57	55.855	3.44516e-13
offhab + momhs	1309.48	57.772	1.32111e-13
momhab + momhs	1309.48	57.772	1.32111e-13
offage + offhab	1309.49	57.783	1.31386e-13
offsex+momhs	1309.86	58.154	1.09141e-13
offsex + offage	1309.98	58.266	1.03197e-13
offhab + momharv	1310.34	58.633	8.58963e-14
offsex+offhs	1310.35	58.636	8.57676e-14
offsex+momharv	1310.78	59.07	6.90369e-14
momhab + offharv	1311.47	59.762	4.88445e-14
offhab	1312.19	60.483	3.40606e-14
offsex	1312.64	60.93	2.72388e-14
offage + momhab	1312.94	61.229	2.34563e-14
momhab + offhs	1313.22	61.509	2.0392e-14
momhab + momharv	1313.86	62.149	1.48076e-14
momhab	1315.53	63.823	6.41181e-15
offage + offharv + momharv	1329.27	77.563	6.65851e-18
offage + offhs + momhs	1330.2	78.488	4.19292e-18
offharv + momhs	1330.88	79.171	2.97992e-18
offage + offharv	1330.9	79.195	2.94437e-18
offharv + offhs	1331.22	79.508	2.51783e-18
offharv + momharv	1331.97	80.264	1.72529e-18
offage + momhs	1332.51	80.801	1.31903e-18
offage + offhs	1333.07	81.361	9.96901e-19
momhs + offhs	1333.45	81.741	8.24396e-19
offage + momharv	1333.49	81.776	8.10095e-19
offharv	1333.54	81.831	7.88121e-19
momharv + momhs	1333.85	82.137	6.7631e-19
momharv + offhs	1334.32	82.608	5.34404e-19
offage	1335.38	83.67	3.14238e-19
momhs	1335.74	84.033	2.6208e-19
offhs	1336.16	84.45	2.12757e-19
momharv	1336.61	84.904	1.69551e-19
null	1338.44	86.734	6.79078e-20
Response = offspring habitat type
Data = Dispersers only
Model	AIC	ΔAIC	wi
offsex	357.3	0	0.661073
null	359.3	2	0.243195
offsex + momhab	362.9	5.6	0.0401999
offsex + offage	363.7	6.4	0.0269468
momhab	364.9	7.6	0.0147887
offage	365.5	8.2	0.0109558
offsex*offage	368.2	10.9	0.00284017
